# Supplementary material
Source: Springer Nature journal article supplement (https://www.springermedizin.de/resource/supplementary/12889_2008_1532_MOESM2_ESM.pdf/9503362)

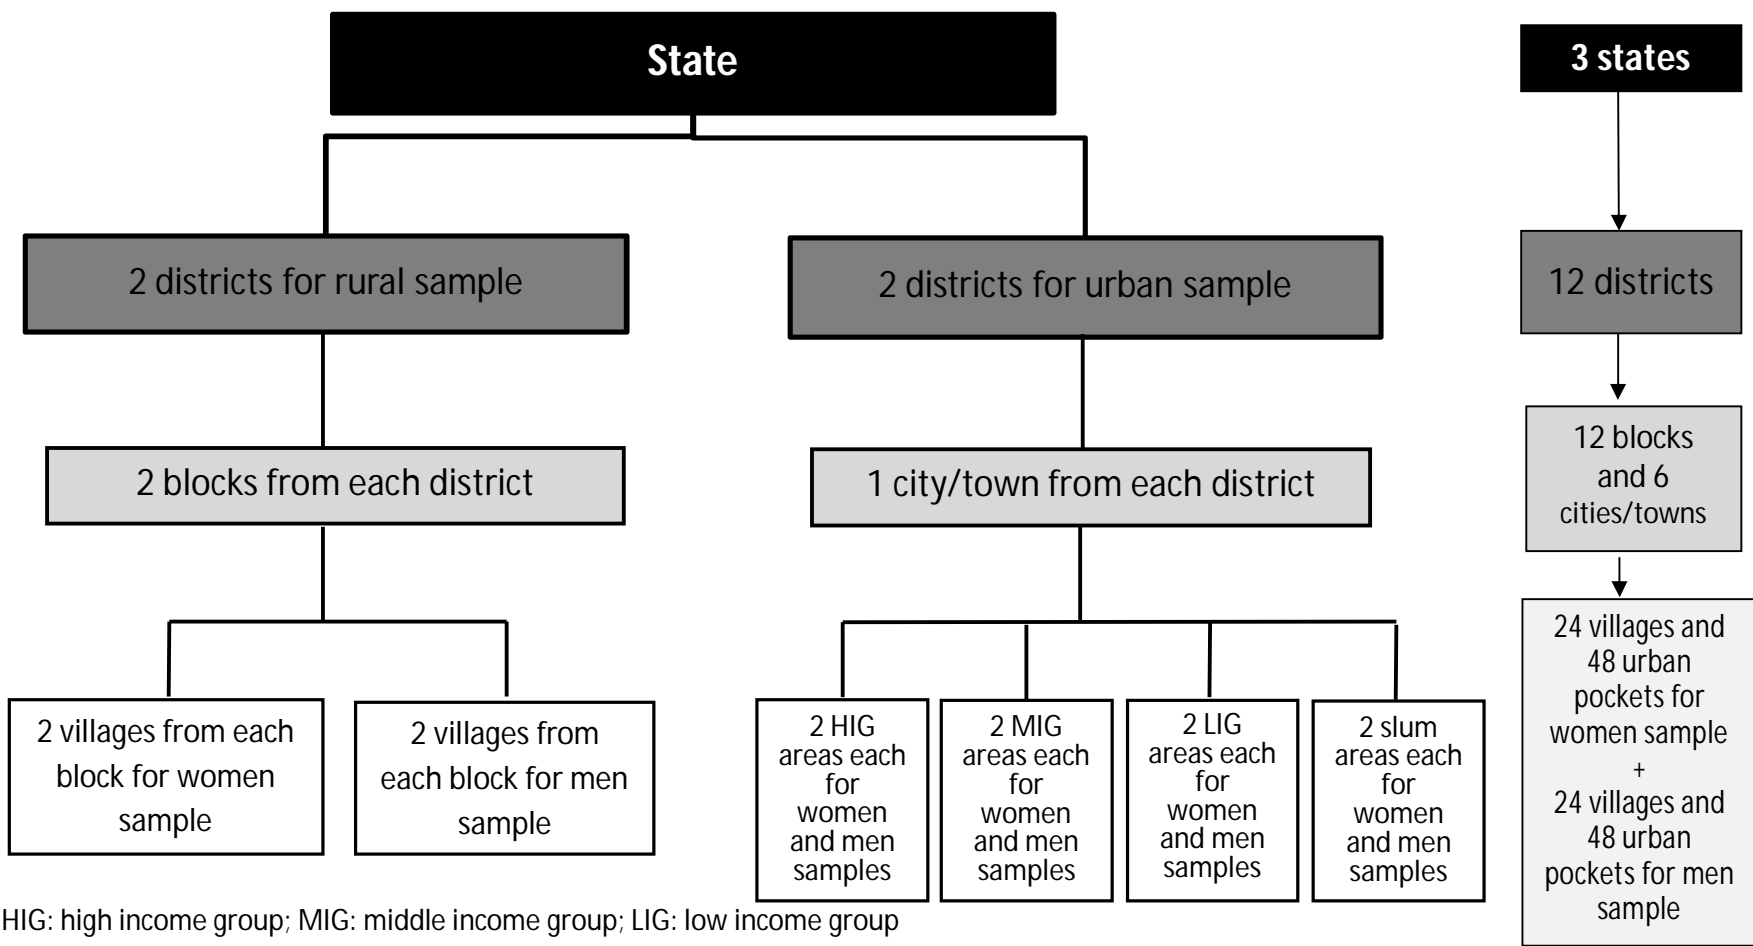

Supplement: MOESM2 [file 9503362]
